# Supplementary material
Source: PubMed Central journal article supplement (PMC11113669)

S Elsen, V Collin-Faure, X Gidrol, C Lemerrier « The opportunistic pathogen *Pseudomonas aeruginosa* activates the DNA double strand break signalling and repair pathway in infected cells.»  
Contact : Claudie Lemerrier, e-mail : claudie.lemerrier @cea.fr

Supplementary Fig. S1

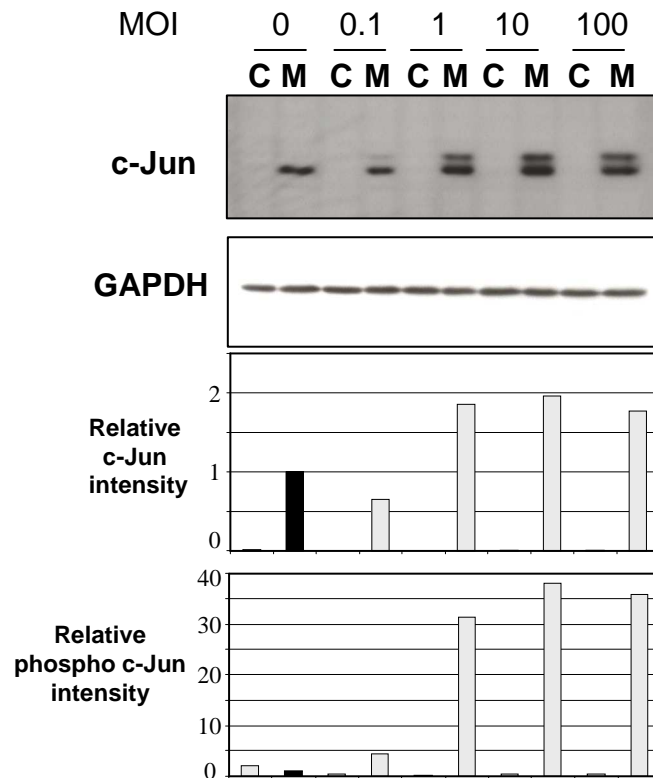

Supplementary Fig. S2

# HL60

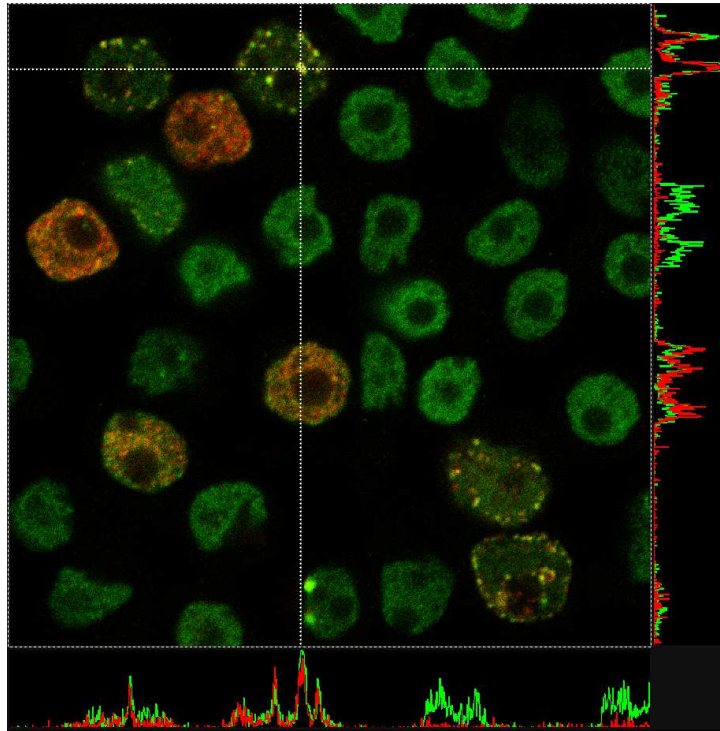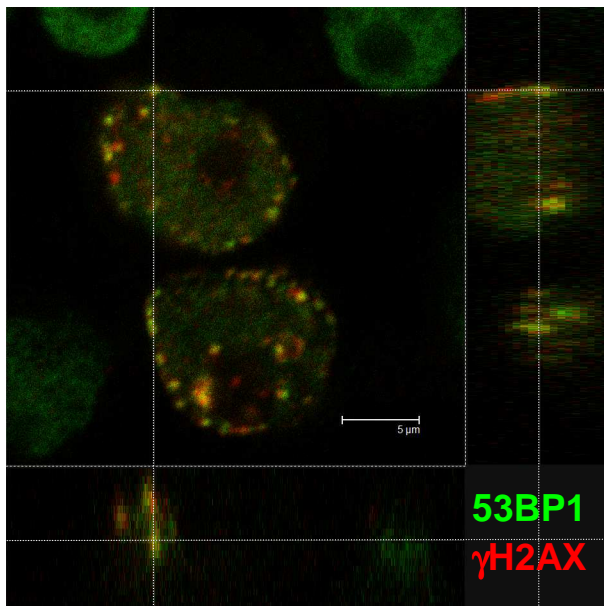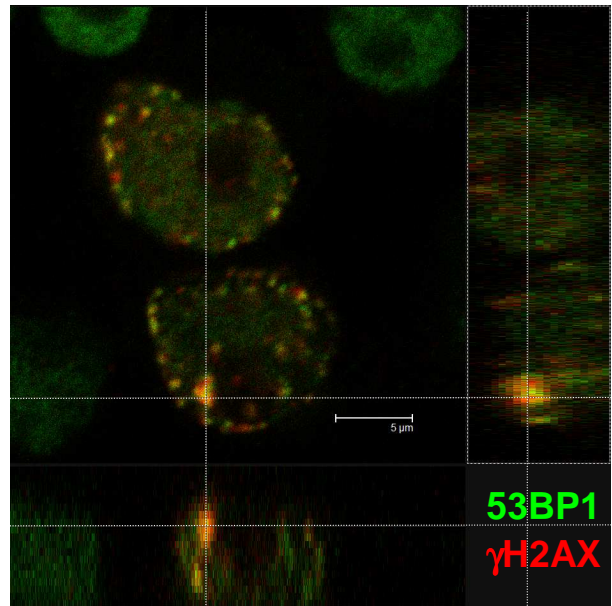

# H1299

0 Gy

2 Gy

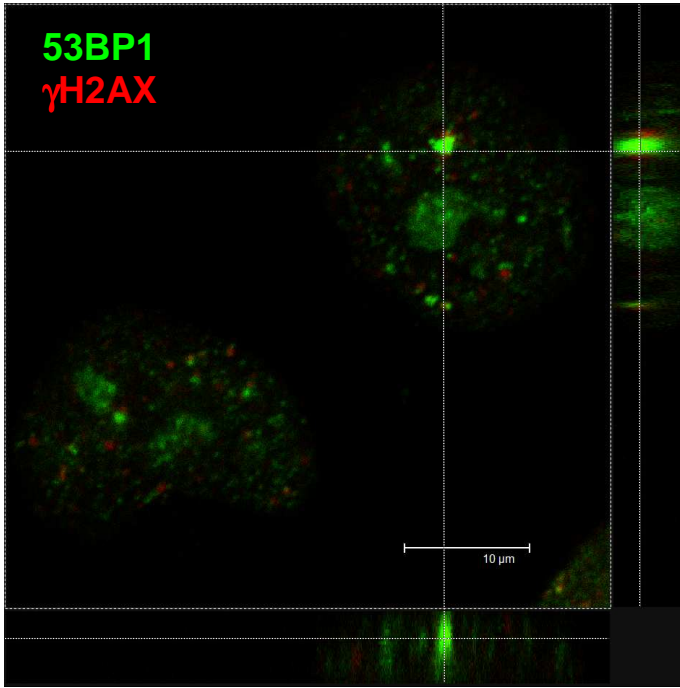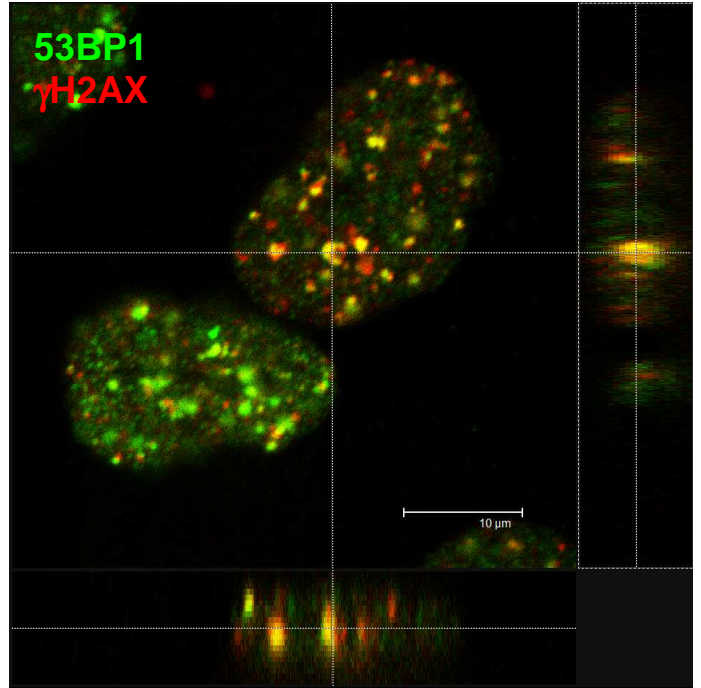

Mock

*P. aeruginosa*

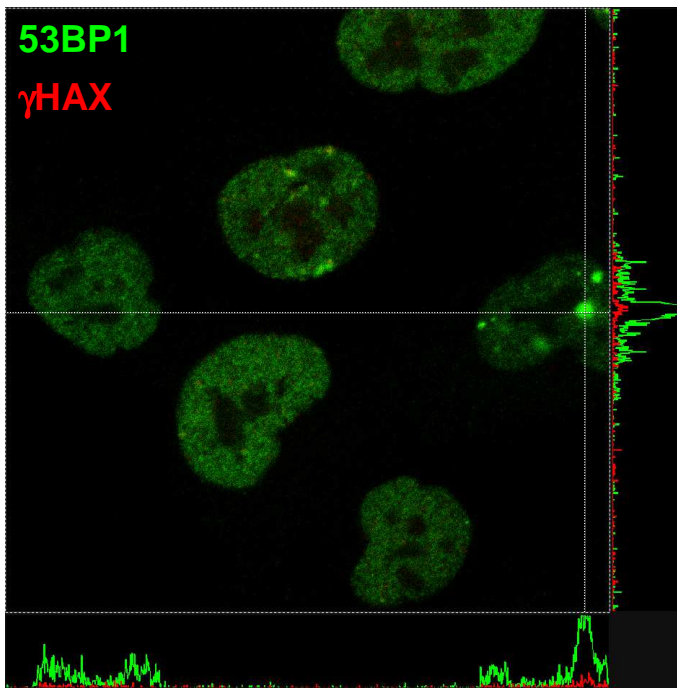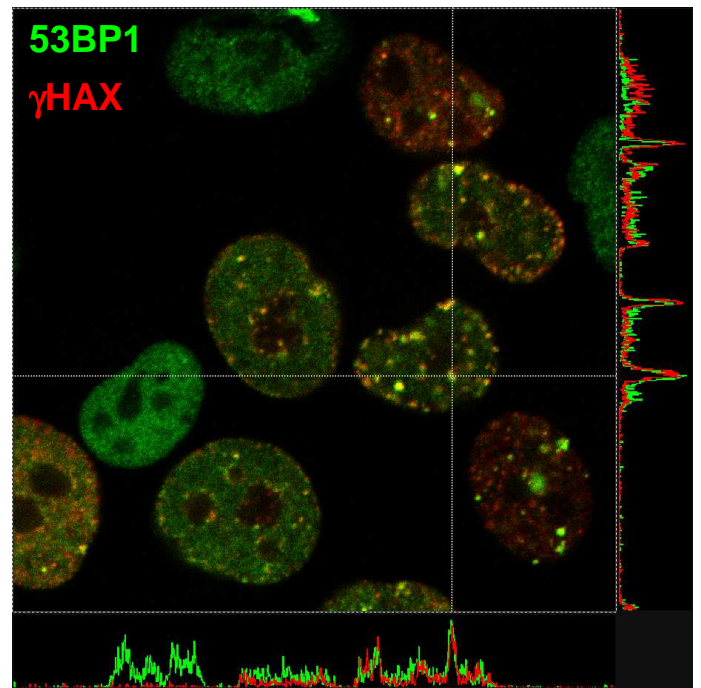

Supplement: 18_2013_1392_MOESM2_ESM.pdf [file 18_2013_1392_MOESM2_ESM.pdf]
